# Supplementary material
Source: Springer Nature journal article supplement (https://www.springermedizin.de/resource/supplementary/12958_2009_617_MOESM4_ESM.pdf/9568104)

**kD**

**113**

**92**

**52**

**35**

**28**

**21**

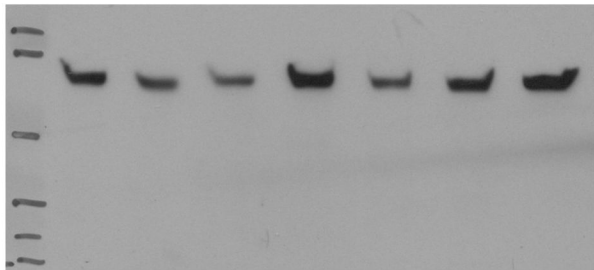

**1**

**2**

**5**

**1**

**2**

**5**

**+**

**Days post-partum**

Supplement: MOESM4 [file 9568104]
